# Supplementary material for: Inhibition of Nox4‐dependent ROS signaling attenuates prostate fibroblast activation and abrogates stromal‐mediated protumorigenic interactions
Source: PubMed Central journal article supplement (PMC6067067; doi:10.1002/ijc.31316), 2018-03-01
Supplement: IJC-143-383-s002.pdf [file IJC-143-383-s002.pdf]

**Supplemental Table 1 Taqman gene expression assays employed in this study**

| <b>Gene</b> | <b>Taqman gene expression assay</b> |
|-------------|-------------------------------------|
| CNN1        | Hs00154543_m1                       |
| COL1A1      | Hs00164004_m1                       |
| COMP        | Hs00164359_m1                       |
| DUOX1       | Hs00213694_m1                       |
| DUOX2       | Hs00204187_m1                       |
| FAP         | Hs00990806_m1                       |
| IGFBP3      | Hs00426289_m1                       |
| NOX1        | Hs00246589_m1                       |
| NOX2        | Hs00166163_m1                       |
| NOX4        | Hs00418356_m1                       |
| NOX5        | Hs00225846_m1                       |
| p22phox     | Hs03044361_m1                       |
| SMA         | Hs01123712_m1                       |

  

| <b>Gene</b> | <b>Custom designed Taqman primers and probes</b>                                                                                |
|-------------|---------------------------------------------------------------------------------------------------------------------------------|
| PSA         | Sense: 5'-GTCTGCGGCGGTGTTCTG-3'<br>Antisense: 5'-TGCCGACCCAGCAAGATC-3'<br>Probe: 5'-FAM-CACAGCTGCCCACTGCATCAGGA-TAMRA-3'        |
| TBP         | Sense: 5'-CACGAACCACGGCACTGATT-3'<br>Antisense: 5'-TTTTCTGCTGCCAGTCTGGAC-3'<br>Probe: 5'-FAM-TCTTCACTCTTGGCTCCTGTGCACA-TAMRA-3' |
